# Supplementary material for: Piezo1-mediated stellate cell activation causes pressure-induced pancreatic fibrosis in mice
Source: JCI journal article supplement (doi:10.1172/jci.insight.158288), 2022-04-21
Supplement: sd1 [file 1]

## Supplemental Materials

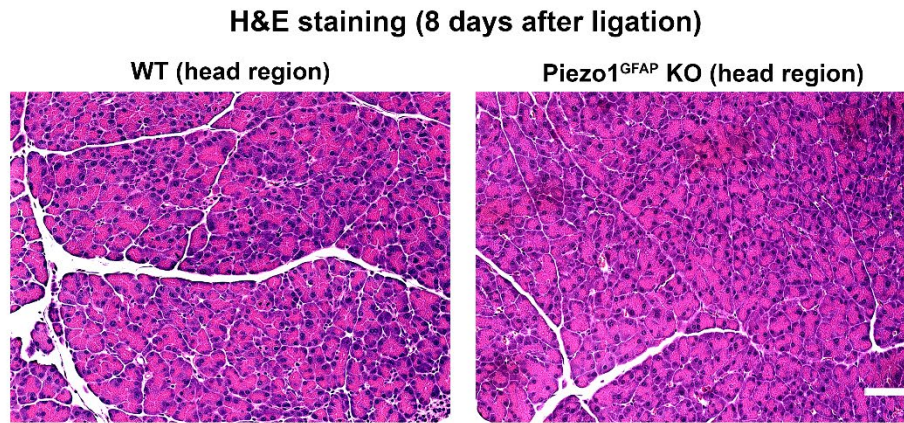

**Supplemental Figure 1. Pancreatic duct ligation at tail region did not affect the head of the pancreas.** Representative H&E stained images of the pancreatic head region of wildtype (WT) and Piezo1<sup>GFAP</sup> KO mice 8 days after PDL (n = 3-7).

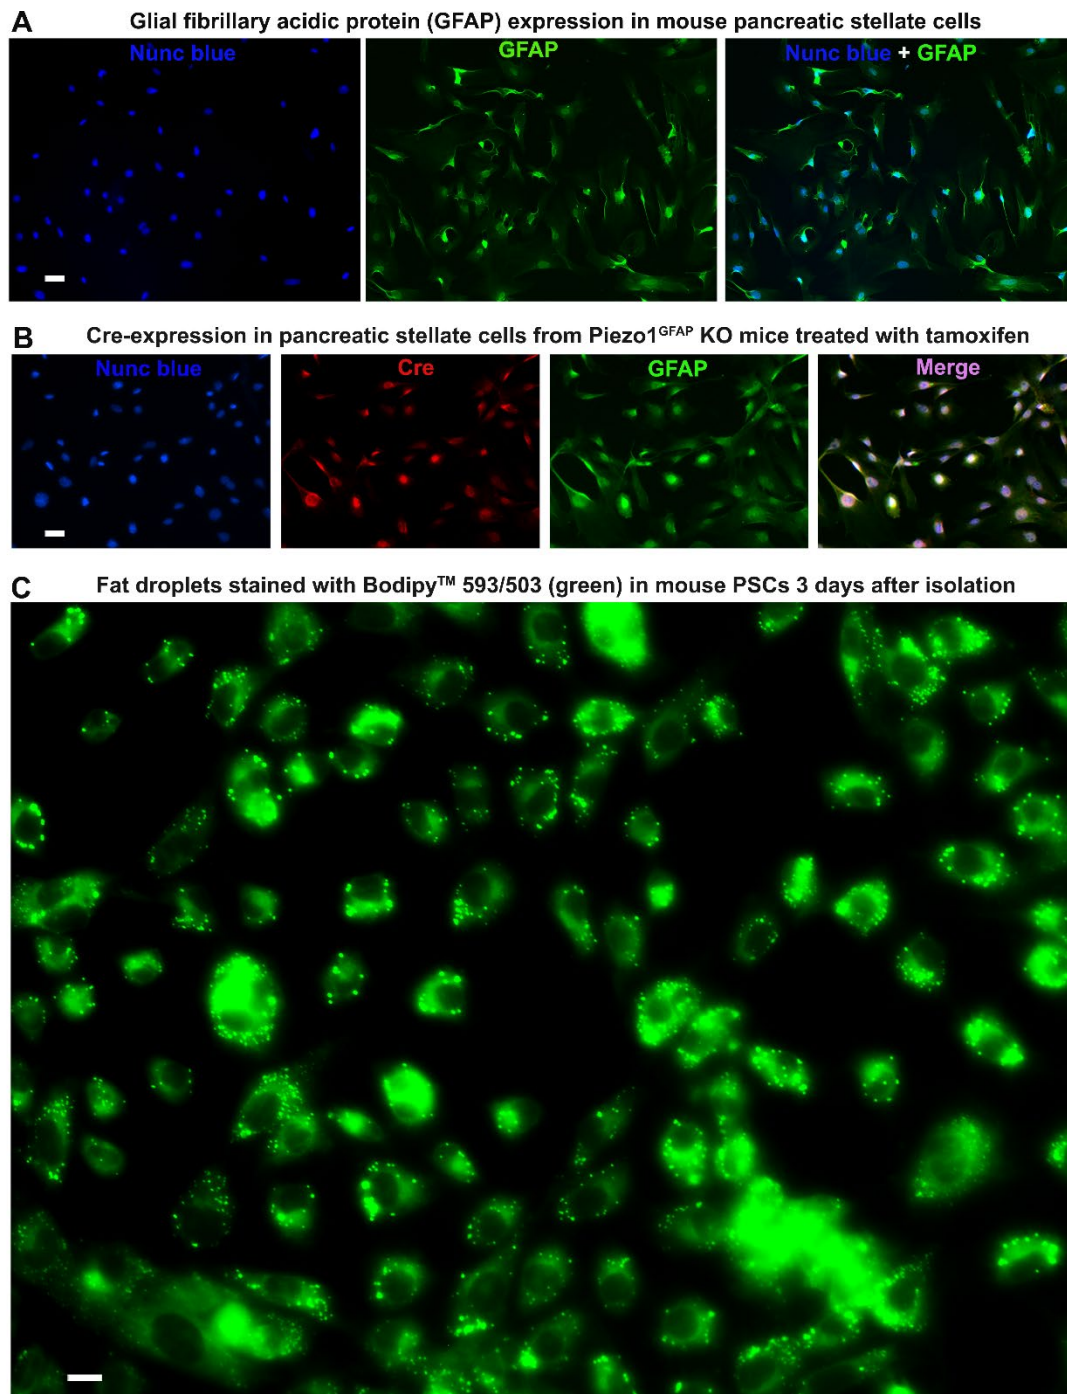

**Supplemental Figure 2. Piezo1 deletion in GFAP-expressing PSCs.** (A) Images showing expression of GFAP (green) in mouse PSCs after 3 days in culture. Cell nuclei were stained with Nunc blue. (B) PSCs expressing Cre protein from the mouse line B6.Cg-Tg (GFAP-cre/ERT2); *Piezo1<sup>fl/fl</sup>* after tamoxifen injection (referred to as *Piezo1<sup>GFAP</sup>* KO mice) confirm deletion of *Piezo1* in PSCs. Scale bar: 20  $\mu$ m. All cells (Nunc blue), expressing Cre protein, and GFAP appear as merged images. (C) Quiescent PSCs containing perinuclear fat droplets (stained with Bodipy<sup>TM</sup> 593/503) were cultured on a Matrigel coated plate. Scale bar: 10  $\mu$ m.

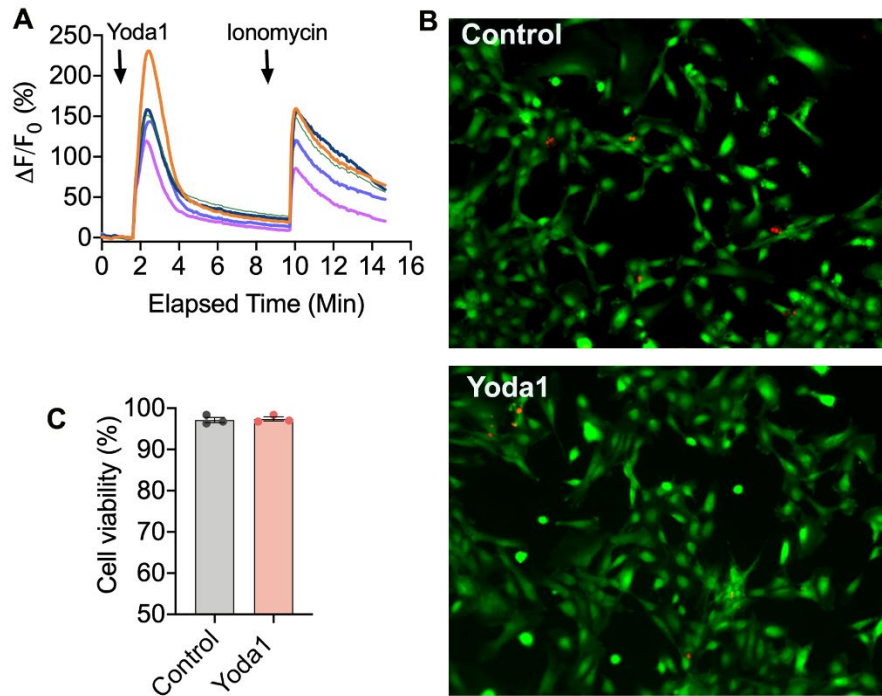

**Supplemental Figure 3. High dose Yoda1 did not affect PSC viability and membrane integrity.** (A) Mouse PSCs responded to ionomycin (1  $\mu$ M) after Yoda1 (25  $\mu$ M) treatment. (B and C) PSCs were treated with Yoda1(25  $\mu$ M) for 2 hrs afterwhich the viability of stellate cells was analyzed using the Live/Dead Cell Imaging Kit (Thermo Fisher Scientific, Catalog # R37601). Representative images show live (green) and dead (red) cells. (C) The graph represents viable cells with and without Yoda1 treatment (n=3 experiments).

### Mechanical activation of Piezo1 channels in mouse stellate cells

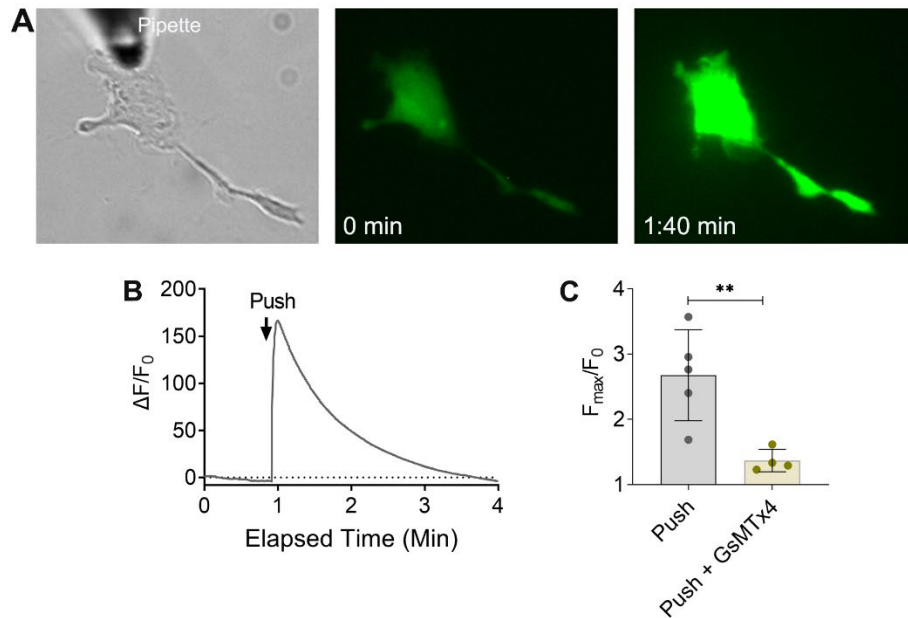

**Supplemental Figure 4. Mechanical pushing increases  $[Ca^{2+}]_i$  in PSCs.** (A) Bright field and live-cell images of mouse PSC at time 0 and at 1:40 (min:s) after mechanical pushing with a blunt tip glass pipette for 1 sec. (B) Representative  $[Ca^{2+}]_i$  profile from a single mouse PSC during the course of mechanical pushing. (C) Graph showing peak  $[Ca^{2+}]_i$  levels following mechanical pushing in PSCs with and without GsMTx4 (2.5  $\mu$ M). \*\*P<0.01, n=4-5.

### 24 hr Yoda1 (mRNA)

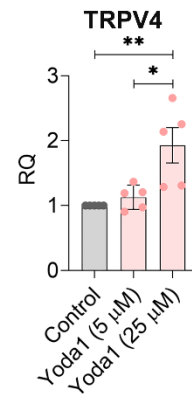

**Supplemental Figure 5. Piezo1 agonist, Yoda1, upregulates TRPV4 expression in PSCs.** mRNA levels of TRPV4 in human PSCs 24 hrs after treatment with Yoda1 (5 μM and 25 μM). \*P<0.05, \*\*P<0.01, n=5.
